# Supplementary material
Source: PubMed Central journal article supplement (PMC3549070)
Supplement: 1207104110_pnas.201207104SI.pdf [file 1207104110_pnas.201207104SI.pdf]

# Supporting Information

Oruganty et al. 10.1073/pnas.1207104110

## SI Materials and Methods

The Aurora wild-type and mutants D3111/T288E and D311N/T288E were purified as described in *Materials and Methods*. All of the proteins were concentrated to contain 1 mg/mL of the mutant/wild-type and Omnia peptide kit 16 (Invitrogen) was used for the assay. The Omnia kit is a sox-based chelation-enhanced fluorescence assay that measures the fluorescence intensity of the phosphorylated peptide (Ex 360 nm/Em 485 nm). A synergy H4 microplate reader in the monochromator

configuration was used to monitor the reaction. Each well had a final concentration of 50- $\mu$ M sox-based peptide, 1 mM ATP, and 1 mM DTT, along with a proprietary buffer formulation premixed into a master mix. The reaction was initiated by adding 30  $\mu$ L master mix to 10  $\mu$ L of the protein in the well, and fluorescence measurements were taken at 1-min intervals for 60 min at 30  $^{\circ}$ C. The reactions were carried out in duplicate from two different purification attempts with similar results.

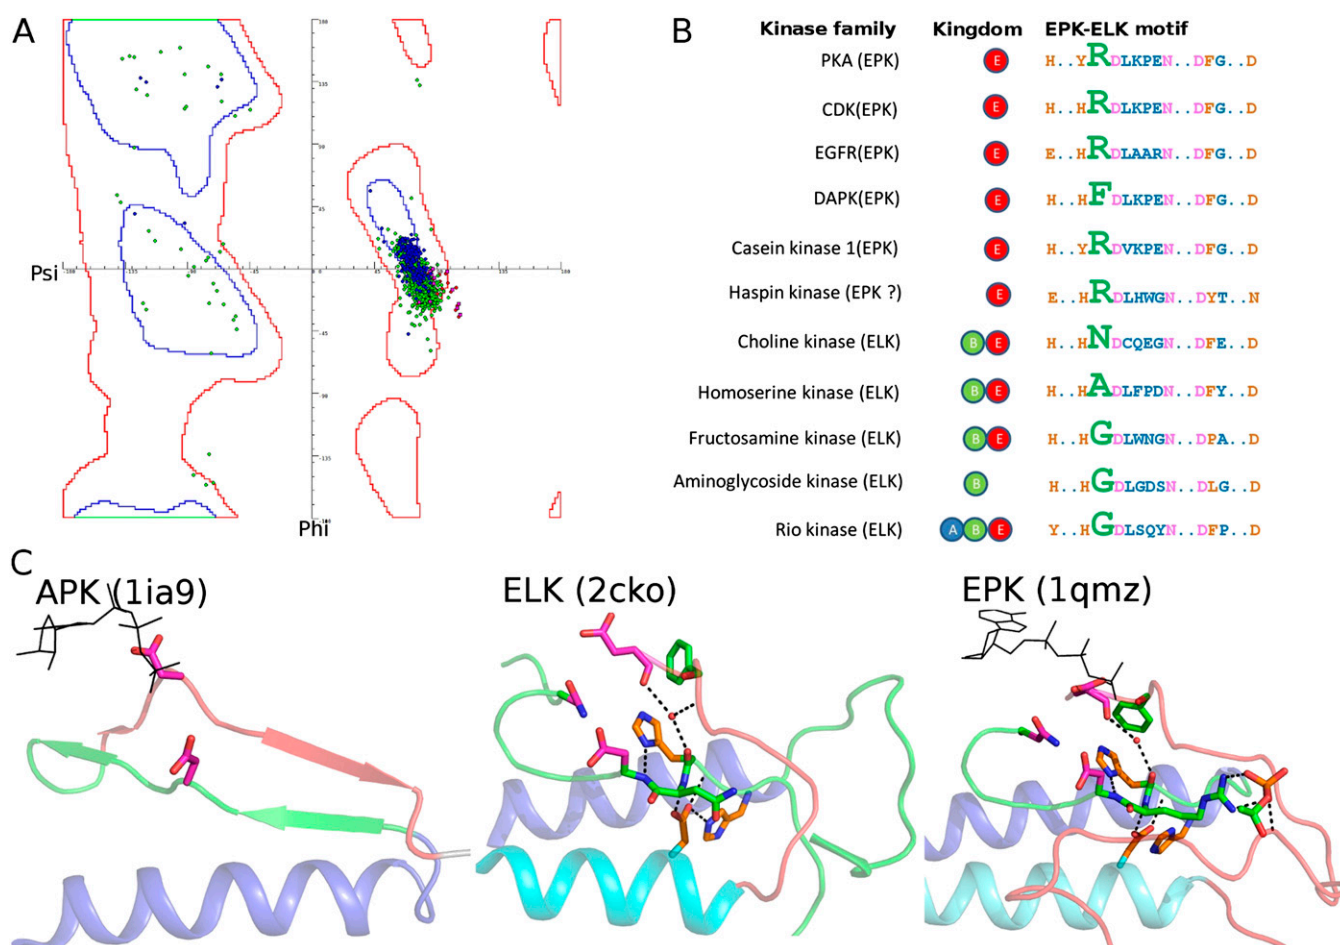

**Fig. S1.** Figure showing the evolution of "strain" with eukaryotic protein kinase/eukaryotic-like kinase (EPK-ELK) component. (A) Ramachandran map of arginine residues in ~1,400 protein kinase (EPK) and ELK structures, with resolution less than 2.0 Å. The panel shows the  $\phi/\psi$  values for the HRD-Arg position in EPKs (circles, 1,468 structures) and ELKs (squares, 12 structures). The EPK residues are colored green if the HRD-Arg position is occupied by Arginine (1,368 structures), and are colored red if a non-Arginine residue occupies that position (100 structures). The ELK residues with glycine at the HRD-Arg position are shown as magenta squares (12 structures). The structures with phosphorylated activation loop are shown in blue (189 structures). (B) The EPK-ELK component residues in multiple EPK and ELK families are shown. The residues are colored according to the scheme given in Fig. 1. For clarity, the residue at the HRD-arginine position in EPKs is shown with a larger font size. The presence of each kinase in Archea, Bacteria, and Eukaryota is indicated by colored circles with A, B, or E. (C) The active site organization in kinases with the catalytic residues colored pink and ATP colored black. The catalytic loop is shown in green and the DFG containing loop is shown in red. The E-helix is colored blue and the F-helix is colored cyan. The APKs, such as Trp-Ca channel kinase (PDB ID 1IA9) shown here do not have an F-helix (Left); (Center) an ELK, Choline kinase (PDB ID 2CKO); (Right) an EPK, CDK (PDB ID 1QMZ). The figure shows the EPK-ELK component residues in colors according to scheme in Fig. 1. The figure was generated using PyMOL.

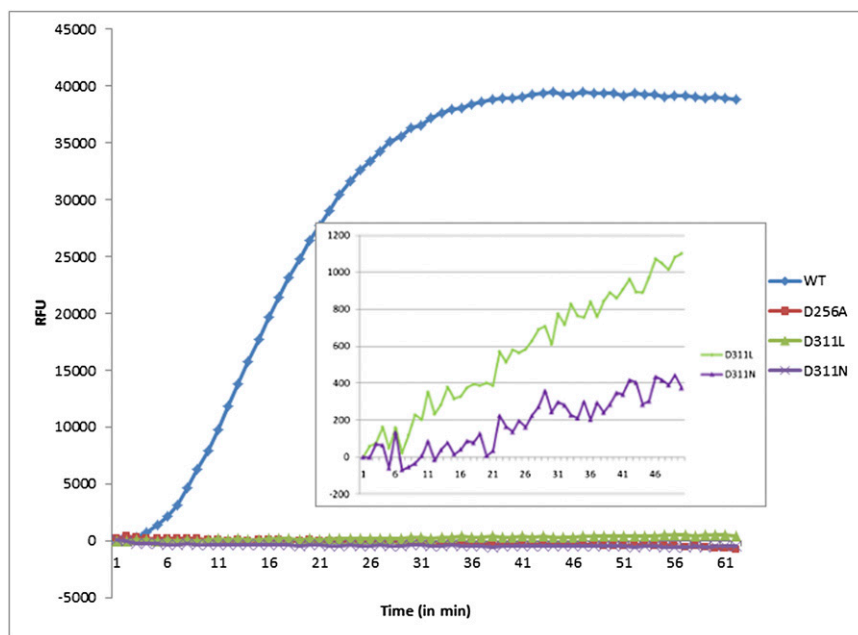

**Fig. S2.** The rate of reaction probed using the Omnia Aurora kinase kit from Invitrogen. The fluorescence intensity increases upon phosphorylation and this is given as relative fluorescence units (RFU). The time course of the reaction is plotted for 60 min, with datapoints taken every 1 min. The substrate peptide concentration was 50  $\mu\text{M}$ , ATP concentration was 10 mM, and each well had 5  $\mu\text{g}$  of either wild-type protein or mutant protein. A zoomed view of only the mutants D311L/T288E (shown as D311L) and D311N/T288E (shown as D311N) is shown (*Inset*) to show the difference in rates between the two mutants (the RFU value difference between the mutants and kinase dead mutant, D256A is plotted). The rates in terms of RFU/min are  $\sim 2,000/\text{min}$  for wild-type, 43.75/min for the D311L/T288E mutant, and 12.5/min for the D311N/T288E mutant. The T288E mutant by itself was also characterized. The T288E mutant showed a slope of activity around 0.8-times of the wild-type without a lag phase.

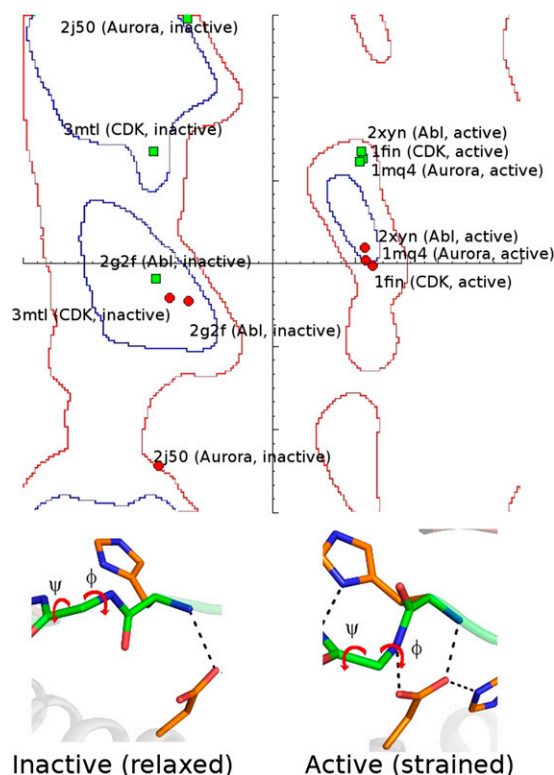

**Fig. S3.** The correlated changes occurring in the DFG-aspartate and HRD-arginine residues occurring when the EPK switches from an active DFG-in conformation to an inactive DFG-out conformation in three families of kinases. The HRD-arginine (Arg) residues are indicated by red circles and the DFG-aspartate (Asp) are indicated by green squares. The PDB structure and the active/inactive state of the kinase is indicated on the Ramachandran map for each point. (*Lower*) the two structures, one with a strained HRD-Arg and DFG-in conformation (PDB ID 1FIN, CDK), and the other with DFG-out conformation and a relaxed HRD-Arg conformation (PDB ID 2G2F, Abl kinase).



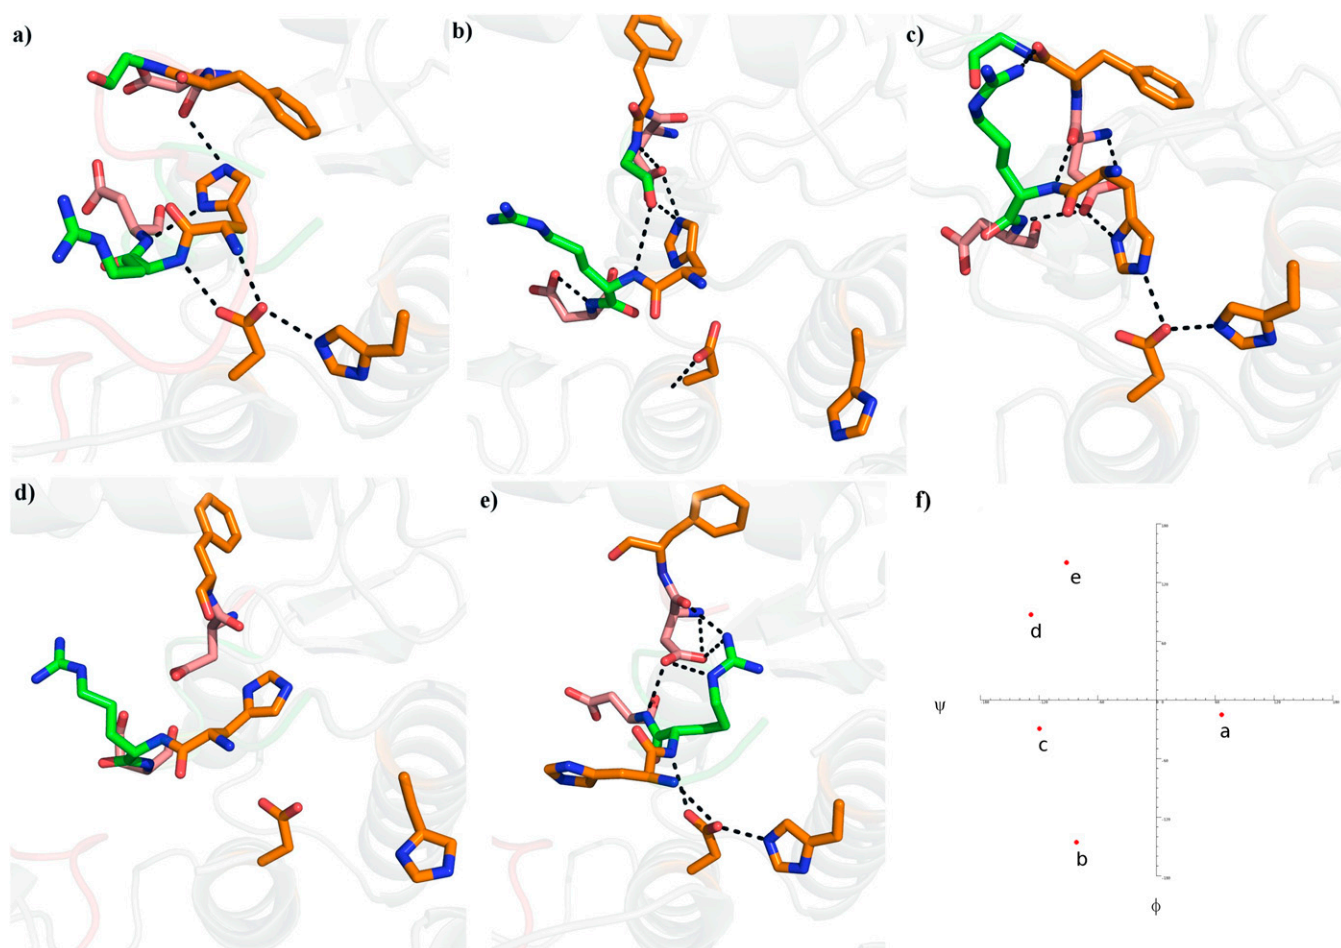

**Fig. 55.** Inactive structures in the transition from strain present state to strain lost state. (A) The Aurora kinase is shown in an active conformation with the strain intact. (B) Destabilization of the DFG loop is correlated with loss of strain in the HRD motif. The DFG motif in these panels is still in a canonical arrangement. (C) The DFG motif is seen “flipping up” in a noncanonical fashion. The HRD-Arg has lost the strain, but the catalytic loop is not perturbed. (D) The catalytic loop undergoes a dramatic change with the F-helix-Asp binding to side-chain of HRD-His. The catalytic loop HRD-Arg hydrogen bonds to the C-helix-Glu. (E) The rotation of the catalytic loop is complete and F-helix-Asp is seen to be bonding to backbone of HRD motif, although HRD-Arg is not under strain. (F) The  $\phi/\psi$  values for each of the structures in the preceding panels. The PDB structure IDs used for generating this figure in order are: 3MYG, 2J50, 3DJ6, 2C6D, and 3LAU.

**Table S1. List of high-resolution kinases (resolution <1.7 Å), which were used to study the strain in the catalytic loop**

| PDB ID        | HRD-Arg residue | $\phi$ angle | $\psi$ angle | N-Ca-C angle (dev)    | Subclass/class   |
|---------------|-----------------|--------------|--------------|-----------------------|------------------|
| 3hmi_A        | Arg             | 76.2         | -2.6         | 117.87 (2.43)         | Abi/TK           |
| 3kfa_A        | Arg             | 82.1         | -13.2        | 115.37 (1.43)         | Abi/TK           |
| 3kfa_B        | Arg             | 81.9         | -13          | 115.60 (1.52)         | Abi/TK           |
| <b>1o6l_A</b> | <b>Arg</b>      | <b>62.9</b>  | <b>-5.6</b>  | <b>121.76 (3.99)</b>  | <b>Akt/AGC</b>   |
| 2wei_A        | Arg             | 80           | -30.5        | 111.84 (0.02)         | CAMK1/CAMK       |
| 3ot3_A        | Arg             | 74.8         | -4.2         | 118.09 (2.51)         | CAMKL/CAMK       |
| 3ot8_A        | Arg             | 74.2         | -4.3         | 117.11 (2.12)         | CAMKL/CAMK       |
| 3pa3_A        | Arg             | 74.4         | -1.4         | 117.20 (2.16)         | CAMKL/CAMK       |
| 3pa4_A        | Arg             | 73.5         | -3           | 118.24 (2.57)         | CAMKL/CAMK       |
| 1gz8_A        | Arg             | 79.5         | -11.9        | 116.60 (1.92)         | CDK/CMGC         |
| 1h00_A        | Arg             | 80.5         | -19          | 117.61 (2.33)         | CDK/CMGC         |
| 1jvp_P        | Arg             | 82.7         | -21.8        | 116.25 (1.78)         | CDK/CMGC         |
| 1oit_A        | Arg             | 83.2         | -16.9        | 115.95 (1.66)         | CDK/CMGC         |
| 1urw_A        | Arg             | 83.5         | -20.3        | 116.97 (2.07)         | CDK/CMGC         |
| 2r3f_A        | Arg             | 79.8         | -15.2        | 118.19 (2.56)         | CDK/CMGC         |
| 2r3g_A        | Arg             | 83.2         | -20.6        | 117.34 (2.22)         | CDK/CMGC         |
| 2r3h_A        | Arg             | 85           | -19.1        | 117.09 (2.12)         | CDK/CMGC         |
| 2r3i_A        | Arg             | 82.1         | -15.3        | 116.29 (1.80)         | CDK/CMGC         |
| 2r3j_A        | Arg             | 83.6         | -20.3        | 117.44 (2.25)         | CDK/CMGC         |
| 2r3l_A        | Arg             | 84           | -21          | 116.63 (1.93)         | CDK/CMGC         |
| 2r3n_A        | Arg             | 76.8         | -22.3        | 117.55 (2.30)         | CDK/CMGC         |
| 2r3p_A        | Arg             | 81.2         | -14.4        | 117.44 (2.25)         | CDK/CMGC         |
| 2r3q_A        | Arg             | 81.2         | -13.5        | 115.95 (1.66)         | CDK/CMGC         |
| 2r3r_A        | Arg             | 78.1         | -12.5        | 117.43 (2.25)         | CDK/CMGC         |
| 2vtt_A        | Arg             | 81.5         | -27.2        | 117.41 (2.25)         | CDK/CMGC         |
| 2izr_A        | Arg             | 71           | 13.5         | 115.49 (1.47)         | CK1/CK1          |
| 1om1_A        | Arg             | 65.5         | 13.7         | 118.18 (2.55)         | CK2/CMGC         |
| <b>2pvr_A</b> | <b>Arg</b>      | <b>70.2</b>  | <b>6.4</b>   | <b>115.84 (1.62)</b>  | <b>CK2/CMGC</b>  |
| 3bqc_A        | Arg             | 73.5         | 8            | 115.60 (1.52)         | CK2/CMGC         |
| 3h30_A        | Arg             | 70.9         | 12.2         | 115.71 (1.56)         | CK2/CMGC         |
| 3h30_B        | Arg             | 70.7         | 6.3          | 113.83 (0.81)         | CK2/CMGC         |
| <b>3juh_A</b> | <b>Arg</b>      | <b>64.1</b>  | <b>21.5</b>  | <b>111.05 (-0.30)</b> | <b>CK2/CMGC</b>  |
| <b>3juh_B</b> | <b>Arg</b>      | <b>78.8</b>  | <b>-1.1</b>  | <b>115.48 (1.47)</b>  | <b>CK2/CMGC</b>  |
| 3mb7_A        | Arg             | 69           | 7.1          | 115.85 (1.62)         | CK2/CMGC         |
| <b>3nsz_A</b> | <b>Arg</b>      | <b>68.1</b>  | <b>13</b>    | <b>115.16 (1.34)</b>  | <b>CK2/CMGC</b>  |
| 3pvg_A        | Arg             | 68.5         | 16.8         | 114.89 (1.24)         | CK2/CMGC         |
| 2eu9_A        | Thr             | 77.5         | -9.4         | 115.78 (1.59)         | CLK/CMGC         |
| <b>1jkl_A</b> | <b>Phe</b>      | <b>66.5</b>  | <b>4.2</b>   | <b>118.01 (2.49)</b>  | <b>DAPK/CAMK</b> |
| 1jks_A        | Phe             | 66           | 5            | 117.56 (2.31)         | DAPK/CAMK        |
| 2a2a_A        | Phe             | 68           | 6.7          | 115.65 (1.54)         | DAPK/CAMK        |
| 2a2a_B        | Phe             | 70.3         | 4.7          | 115.56 (1.51)         | DAPK/CAMK        |
| 2a2a_C        | Phe             | 64.7         | 10.3         | 116.29 (1.79)         | DAPK/CAMK        |
| 2a2a_D        | Phe             | 69.7         | 10.1         | 115.66 (1.54)         | DAPK/CAMK        |
| 2w4j_A        | Phe             | 66.7         | 11.5         | 116.06 (1.71)         | DAPK/CAMK        |
| 3bhy_A        | Phe             | 71           | 1.5          | 116.12 (1.73)         | DAPK/CAMK        |
| <b>3eha_A</b> | <b>Phe</b>      | <b>68.2</b>  | <b>6.1</b>   | <b>115.63 (1.53)</b>  | <b>DAPK/CAMK</b> |
| <b>3gu4_A</b> | <b>Phe</b>      | <b>70.1</b>  | <b>2.9</b>   | <b>116.54 (1.90)</b>  | <b>DAPK/CAMK</b> |
| <b>3gu5_A</b> | <b>Phe</b>      | <b>67.4</b>  | <b>6.2</b>   | <b>116.32 (1.81)</b>  | <b>DAPK/CAMK</b> |
| 3gu6_A        | Phe             | 70.7         | 4.8          | 114.85 (1.22)         | DAPK/CAMK        |
| 3gu8_A        | Phe             | 65.9         | 4.2          | 117.02 (2.09)         | DAPK/CAMK        |
| 2qo2_A        | Arg             | 75           | -15.1        | 115.59 (1.51)         | Eph/TK           |
| <b>2qo7_A</b> | <b>Arg</b>      | <b>73.8</b>  | <b>-12.7</b> | <b>115.76 (1.58)</b>  | <b>Eph/TK</b>    |
| <b>2qo9_A</b> | <b>Arg</b>      | <b>73.2</b>  | <b>-10.7</b> | <b>115.70 (1.56)</b>  | <b>Eph/TK</b>    |
| 2qob_A        | Arg             | 72.9         | -7.7         | 116.41 (1.84)         | Eph/TK           |
| 2qoc_A        | Arg             | 74           | -8.7         | 115.78 (1.59)         | Eph/TK           |
| 2qod_A        | Arg             | 75           | -14.4        | 115.56 (1.50)         | Eph/TK           |
| 2qof_A        | Arg             | 75.6         | -15.2        | 116.42 (1.85)         | Eph/TK           |
| 2qoi_A        | Arg             | 76.1         | -13.8        | 115.80 (1.60)         | Eph/TK           |
| 2qok_A        | Arg             | 73.7         | -11.2        | 115.66 (1.54)         | Eph/TK           |
| 2qol_A        | Arg             | 74.8         | -14.1        | 116.13 (1.73)         | Eph/TK           |
| 2qoo_A        | Arg             | 72           | -7           | 116.51 (1.88)         | Eph/TK           |
| <b>2qoq_A</b> | <b>Arg</b>      | <b>73.7</b>  | <b>-6.7</b>  | <b>115.75 (1.58)</b>  | <b>Eph/TK</b>    |

Table S1. Cont.

| PDB ID        | HRD-Arg residue | $\phi$ angle | $\psi$ angle | N-Ca-C angle (dev)   | Subclass/class |
|---------------|-----------------|--------------|--------------|----------------------|----------------|
| 2rei_A        | Arg             | 79.7         | -27.5        | 115.77 (1.59)        | Eph/TK         |
| 2vwx_A        | Arg             | 76.5         | -14          | 116.86 (2.02)        | Eph/TK         |
| 2vwy_A        | Arg             | 79.5         | -13.1        | 115.44 (1.45)        | Eph/TK         |
| 2vwz_A        | Arg             | 76.9         | -12.6        | 115.08 (1.31)        | Eph/TK         |
| 2vx1_A        | Arg             | 78           | -12.8        | 116.03 (1.69)        | Eph/TK         |
| 1mp8_A        | Arg             | 70.4         | -1.3         | 117.28 (2.19)        | Fak/TK         |
| 2jko_A        | Arg             | 77.3         | -4.3         | 115.14 (1.34)        | Fak/TK         |
| 3cc6_A        | Arg             | 76.9         | -2           | 116.26 (1.78)        | Fak/TK         |
| 1p4o_A        | Arg             | 81.1         | -18.9        | 113.59 (0.72)        | InsR/TK        |
| 1p4o_B        | Arg             | 81.7         | -17.5        | 113.97 (0.87)        | InsR/TK        |
| 3bu3_A        | Arg             | 74           | -9.2         | 117.10 (2.12)        | InsR/TK        |
| 3lxp_A        | Arg             | 74.5         | 2.8          | 115.55 (1.50)        | Jak/TK         |
| 2b9h_A        | Arg             | 74.1         | -6.9         | 116.34 (1.82)        | MAPK/CMGC      |
| 2fst_X        | Arg             | 81.6         | -6.3         | 113.85 (0.82)        | MAPK/CMGC      |
| 3dkc_A        | Arg             | 82.5         | -22.8        | 115.88 (1.63)        | Met/TK         |
| 3f66_A        | Arg             | 78.3         | -14.2        | 116.01 (1.68)        | Met/TK         |
| 3f66_B        | Arg             | 82.1         | -19.9        | 116.10 (1.72)        | Met/TK         |
| 2w5a_A        | Arg             | -137         | 151.5        | 111.02 (-0.31)       | NEK/Other      |
| 3ork_A        | Arg             | 82.9         | -12.9        | 115.55 (1.50)        | NEK/Other      |
| 1t46_A        | Arg             | 82.1         | -17.1        | 116.27 (1.79)        | PDGFR/TK       |
| 3g0e_A        | Arg             | 86.5         | -14.1        | 115.47 (1.47)        | PDGFR/TK       |
| 3a99_A        | Arg             | 66.1         | 8.3          | 117.34 (2.22)        | PIM/CAMK       |
| <b>1rdq_E</b> | <b>Arg</b>      | <b>73.2</b>  | <b>12.4</b>  | <b>116.47 (1.87)</b> | <b>PKA/AGC</b> |
| 1xh8_A        | Arg             | 69.2         | 1.7          | 118.30 (2.60)        | PKA/AGC        |
| 1xh9_A        | Arg             | 70.3         | 10.2         | 118.08 (2.51)        | PKA/AGC        |
| <b>3fjq_E</b> | <b>Arg</b>      | <b>67.4</b>  | <b>13.9</b>  | <b>119.23 (2.97)</b> | <b>PKA/AGC</b> |
| <b>3idb_A</b> | <b>Arg</b>      | <b>69.2</b>  | <b>11.1</b>  | <b>123.62 (4.73)</b> | <b>PKA/AGC</b> |
| 1fmk_A        | Arg             | 83.9         | -11.4        | 115.59 (1.52)        | Src/TK         |
| <b>1qpc_A</b> | <b>Arg</b>      | <b>74.3</b>  | <b>-4.4</b>  | <b>117.71 (2.37)</b> | <b>Src/TK</b>  |
| 2src_A        | Arg             | 81.6         | -7.9         | 117.23 (2.17)        | Src/TK         |
| 2c30_A        | Arg             | 73.2         | 0.7          | 116.49 (1.88)        | STE20/STE      |
| 2j0i_A        | Arg             | 71.1         | 2.7          | 117.57 (2.31)        | STE20/STE      |
| 3a7f_A        | Arg             | 75           | -7.9         | 117.57 (2.31)        | STE20/STE      |
| 3a7i_A        | Arg             | 70.8         | -0.7         | 118.49 (2.68)        | STE20/STE      |
| 3a7j_A        | Arg             | 67.3         | -1.1         | 117.93 (2.45)        | STE20/STE      |
| 3fxz_A        | Arg             | 75.9         | -1.5         | 117.77 (2.39)        | STE20/STE      |
| 1xbb_A        | Arg             | 74.7         | 4.6          | 114.81 (1.20)        | Syk/TK         |
| 3gen_A        | Arg             | 78.4         | -14.2        | 116.18 (1.75)        | Tec/TK         |
| 3miy_A        | Arg             | 80.9         | -14.9        | 114.79 (1.19)        | Tec/TK         |
| 3miy_B        | Arg             | 80.1         | -14.3        | 115.78 (1.59)        | Tec/TK         |
| 3ewh_A        | Arg             | 78.1         | -10.7        | 116.17 (1.75)        | VEGFR/TK       |

The N-Ca-C angle is given and in parentheses, its deviation from ideal angle is given as SDs above mean. The subclass/class classification was taken from the Kinbase database. The "active" conformations according to definition given *Materials and Methods* are in boldface.

**Table S2. Contingency tables for the features studied in this article**

| Relax/strain       | Feature occurring                                      | Feature not occurring                                          | Column total |
|--------------------|--------------------------------------------------------|----------------------------------------------------------------|--------------|
| <b>DFG-in</b>      | DFG-in (R-spine formed)                                | DFG-out (R-spine not formed)                                   |              |
| Relax              | 157                                                    | 16                                                             | 173          |
| Strain             | 2,145                                                  | 124                                                            | 2269         |
| Row total          | 2,302                                                  | 140                                                            | 2442         |
| <b>F-helix-Asp</b> | F-helix-Asp makes 2 canonical hbonds with HRD backbone | F-helix-Asp does not make 2 canonical hbonds with HRD backbone |              |
| Relax              | 0                                                      | 173                                                            | 173          |
| Strain             | 2,198                                                  | 71                                                             | 2269         |
| Row total          | 2,243                                                  | 199                                                            | 2442         |
| <b>HRD-His</b>     | HRD-His makes 2 H bonds with HRD and DFG backbone      | HRD-His not making 2 H bonds with HRD and DFG backbone         |              |
| Relax              | 45                                                     | 128                                                            | 173          |
| Strain             | 1,357                                                  | 912                                                            | 2269         |
| Row total          | 1,402                                                  | 1040                                                           | 2442         |
| <b>EPK-ELK</b>     | Four canonical EPK-ELK component H bonds present       | Four canonical EPK-ELK component H bonds not present           |              |
| Relax              | 0                                                      | 173                                                            | 173          |
| Strain             | 1,357                                                  | 912                                                            | 2269         |
| Row total          | 1,357                                                  | 1,085                                                          | 2442         |
| <b>E-helix-His</b> | E-helix-His interacting with F-helix aspartate         | E-helix-His not interacting with F-helix aspartate             |              |
| Relax              | 4                                                      | 169                                                            | 173          |
| Strain             | 1,113                                                  | 1,156                                                          | 2269         |
| Row total          | 1,117                                                  | 1,325                                                          | 2442         |

In each case, the feature studied is compared against the presence/loss of strain (strain and relax, respectively, in the table). The row and column totals are given for each of the contingency tables.

**Table S3. Statistics of the strained and relaxed form HRD-Arg containing structures with various ligands**

| Structure                       | Strain (2,269) | Relaxed (173) |
|---------------------------------|----------------|---------------|
| ATP*                            | 63             | 7             |
| ANP <sup>†</sup>                | 127            | 9             |
| ADP                             | 64             | 5             |
| Lys-Glu                         | 1,606          | 73            |
| TPO/SEP/PTR                     | 652            | 66            |
| TPO/SEP/PTR + ATP/ANP           | 69             | 6             |
| Lys-Glu + ATP/ANP               | 119            | 3             |
| Lys-Glu + ADP                   | 47             | 3             |
| Lys-Glu + ATP/ANP + TPO/SEP/PTR | 50             | 0             |

Note that there are structures from different resolutions in the statistics and the list includes mutant forms. Manual assessment of each of the cases in the relaxed form was carried out along with analysis of electron density visualization to assess the significance of the strain status for activity.

\*The relaxed forms consist of PDB ID 1UA2 (resolution 3.02), PDB ID 159I (ATP and inhibitor-bound structure), and PDB ID 3KMW (pseudoactive site of ILK in inactive conformation).

<sup>†</sup>The relaxed forms consist of one chain of PDB ID 2A19 (chain C), which shows a relaxed form, whereas chain B shows a strained form. PDB ID 3COK is an unusual inactive conformation of PDB ID PLK4, even when bound to ANP. PDB ID 1AD5 is an Hck structure with similarities to inactive CDK structure. PDB ID 2EB3, EGFR L858R mutant (resolution 2.84), although a higher resolution structure (PDB ID 2ITV) shows HRD-Arg in strained conformation. PDB ID 2C6D is an unusual Aurora A inactive conformation bound to ANP.
